# Supplementary material
Source: publisher site journal article supplement (https://www.dovepress.com/article/479764)
Supplement: Supplementary file 1 [file get_supplementary_file.php]

**Supplementary Table 1**

| Case number | 1 | | 2 | 3 | 4 |
| --- | --- | --- | --- | --- | --- |
| **First Admission** | | | | | |
| Date | 25 May 2023 | | 2 December 2022 | 3 January 2023 | 4 June 2023 |
| Sex | Female | | Female | Male | Male |
| Age | 36 | | 69 | 57 | 69 |
| Underlying disease | -PAN  -Cryoglobulinemia | | -DLBCL stage IV  -DM (HbA1C 7.08) | Relapsed and Refractory DLBCL stage IVA | -ESRD S/P LRKT 2010  -DM  -HT |
| Current baseline Immune suppressive | -Rituximab  (Last 22/10/2023)  -Tocilizumab (Last 2/11/2023)  -Methotrexate 7.5 mg/wk and Prednisolone 15 mg/day (Ongoing) | | Intrathecal-methotrexate + Rituximab  (Last 2/9/2022) | Rituximab, Etoposide, Methylprednisolone, Cisplatin, Cytarabine, and Venetoclax  Last (25/12/2022) | Tacrolimus 1 mg/day, Mycophenolate 1,440 mg/day, and Prednisolone 5 mg/day (Ongoing) |
| Interval from the last dose of Rituximab to COVID-19 infection | 7 months | | 3 months | 10 days | N/A |
| Last Vaccination history (dose) | mRNA-1273 (Moderna)  - Last dose in February 2022 | | BNT162b2 (Pfizer)  -Last dose in June 2022 | BNT162b2 (Pfizer)  -Last dose in May 2022 | BNT162b2 (Pfizer)  -Last dose in December 2022 |
| COVID-19 exposure history | No household contact, No travel history | | No household contact, No travel history | No household contact, No travel history | No household contact, No travel history |
|  |  | |  |  |  |
| Clinical | |
| Fever | Yes | | Yes | Yes | No |
| cough | No | | Yes | No | Yes |
| URI | Yes | | No | No | No |
| Dyspnea | No | | Yes | No | Yes |
| Diagnostic test | |
| RT-PCR | Positive (Ct 18) | | Positive (Ct 34.1) | N/A | N/A |
| ATK | Positive | | N/A | Positive | Positive |
| Oxygen support | Oxygen cannula 5 LPM | | Oxygen canula 3 LPM | None | None |
| Oxygen saturation | Room air 95% | | Room air 94% | Room air 98% | N/A |
| Molnupiravir | No | | No | No | No |
| Total duration Remdesivir (days) | 10 | | No | 5 | 5 |
| Steroid treatment /total duration | IVMP 250 mg then dexamethasone 20 mg (10 days) then dexamethasone 10 mg/day (10 days) | | -Dexamethasone 20 mg/day (4/12/-8/12/2022)  -Prednisolone (from 40 to 15 mg/day 9/12/2022-9/2/2023) | None | None |
| Other Immunosuppression /Total duration | Baricitinib (13 days) | | None | None | None |
| LAAB (Tixagevimab/Cligavimab) | None | | 9/1/2023 | 5/1/2023 | None |
| Highest CRP (mg/L) | 116 | | 100.41 | 24.4 | N/A |
| IL-6 (pg/mL) | 11.46 | | N/A | N/A | N/A |
| Clinical Improvement | No | | Yes | Yes | Yes |
| Home Oxygen | Yes | | Yes | No | No |
| **Persistent COVID-19 infection** | | | | | |
| Date | 23/11/2023 | | 9/2/2023 | 11/2/2023 | 4/9/2023 |
| Clinical |  | |  |  |  |
| Fever | Yes | | Yes | Yes | Yes |
| cough | Yes | | Yes | No | Yes |
| URI | No | | No | No | No |
| Dyspnea | Yes | | Yes | No | No |
| Diagnostic test |  | |  |  |  |
| RT-PCR | Positive (Ct 25.5)  Repeated (6/12/66) Ct 30.26, (14/12/66) not detected | | Positive (Ct 21.9) | Positive (Ct 30.0) | Positive (Ct 34.02) |
| ATK | Positive | | N/A | N/A | Positive |
| Oxygen saturation | Room air 89% | | Room air 85% | Room air 98% | Room air 95% |
| Molnupiravir | No | | No | No | No |
| Total duration Remdesivir (d) | 21 | | 10 | 5 | 10 |
| Steroid treatment | Prednisolone 15 mg/day | | None | None | Prednisolone 15 mg/day |
| Other Immunosuppression | Tofacitinib | | None | None | None |
| Anti RBD IgG  (AU/ml) | 2091.8 | | 16.830 | >40,000 | 4,900 |
| Anti-Nucleocapsid IgG (AU/ml) | Negative | | Negative | Negative | Negative |
| LAAB (Tixagevimab/Cligavimab) | None | | 17/2/2023 | None | None |
| Highest CRP (mg/L) | 28.23 | | 91.17 | 69.95 | 12.84 |
| IL-6 (pg/mL) | 1525.25 | | N/A | N/A | <1.5 |
| Home Oxygen | No | | No | No | No |

**Supplementary Table** 1: Patient profiles of cases no. 1–4, divided into two episodes—first admission and persistent COVID-19 infection.

**Abbreviations**: Anti-N IgG, anti-nucleocapsid immunoglobulin G; Anti-RBD IgG, anti-receptor binding-domain immunoglobulin G; ATK, antigen test kit; Ct, cycle threshold; DM, diabetes mellitus; DLBCL, diffuse large B-cell lymphoma; ESRD, end-stage renal disease; HT, hypertension; IVMP, intravenous methylprednisolone; IL, interleukin; LRKT, living-related kidney transplant; LAAB, long-acting antibody; mRNA, messenger ribonucleic acid; mg, milligram; N/A, not applicable; PAN, polyarteritis nodosa; RT-PCR, real-time polymerase chain reaction; URI, upper respiratory tract infection.

**Supplementary Figure 1**


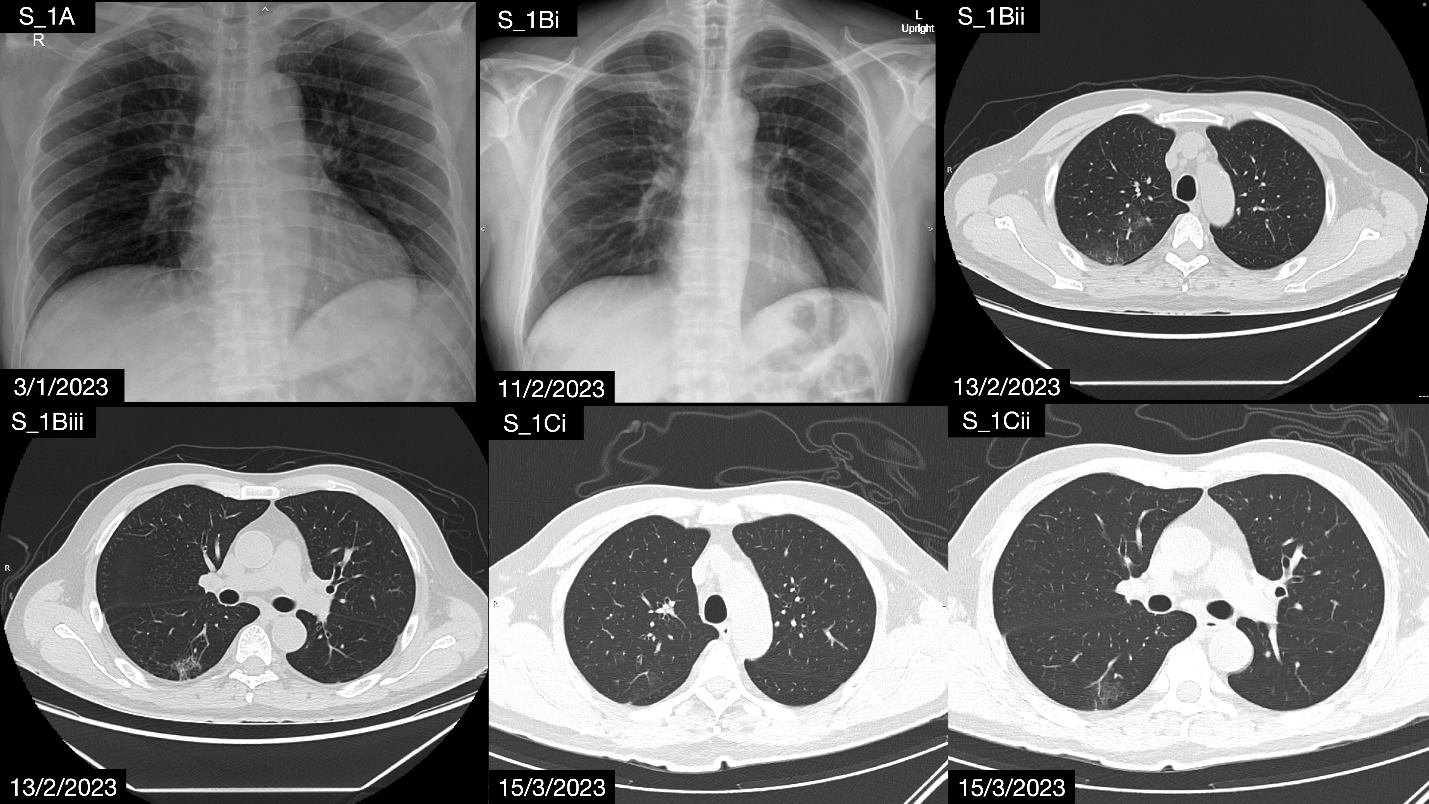


**Supplementary Figure 1 (3A-C)** Demonstrating chest radiograph and computed tomography (CT) images of patient No.3

**Supplementary Figure 2**


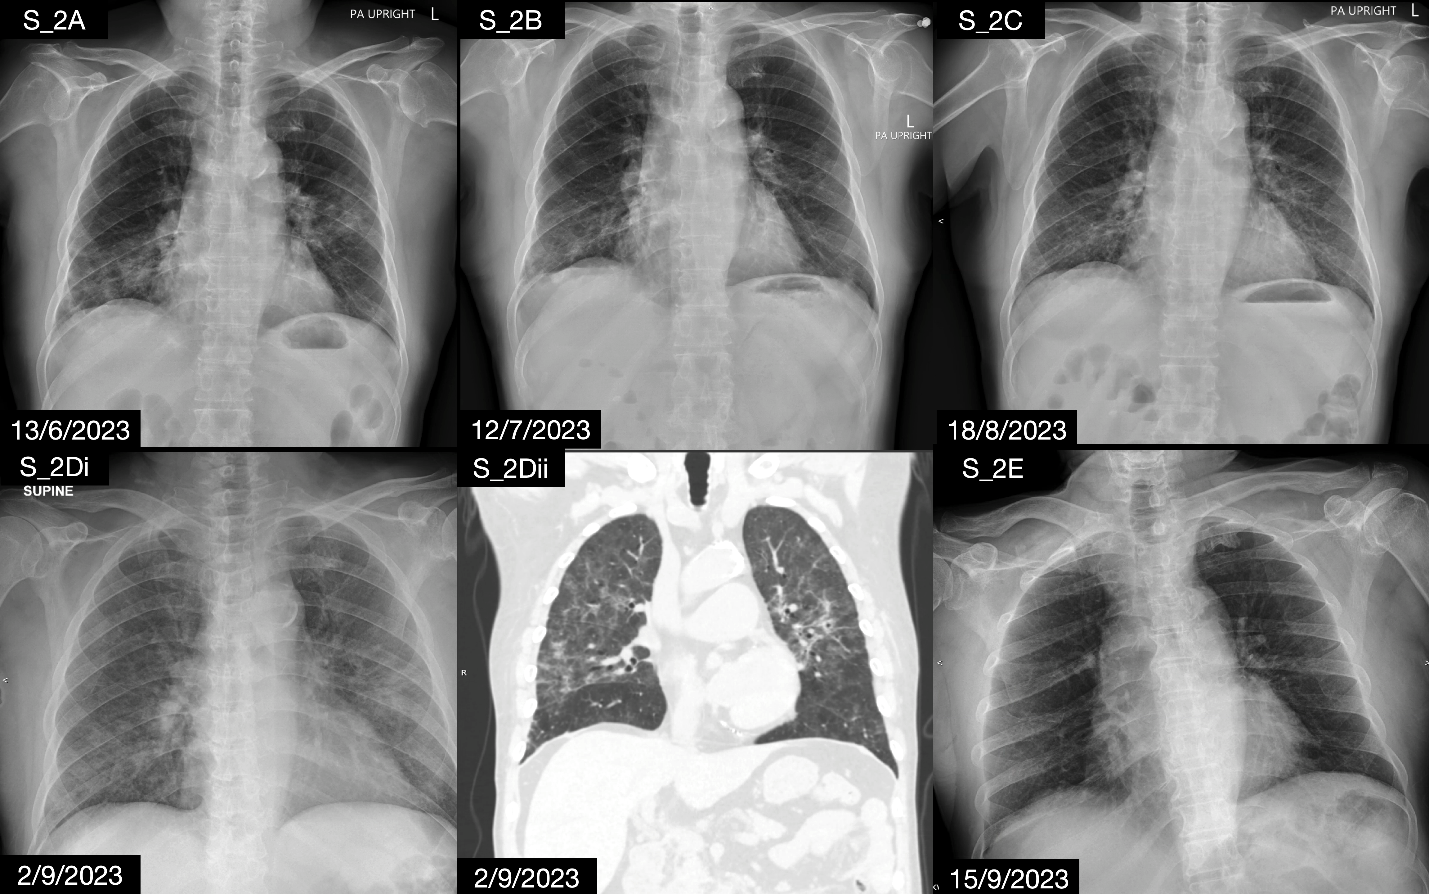


**Supplementary Figure 2 (4A-E)** Demonstrating chest radiograph and computed tomography (CT) images of patient No.4
